# Supplementary material for: Core–shell FTO@Co3O4 nanoparticles as active and stable anode catalysts for acidic oxygen evolution reaction and proton exchange membrane water electrolysis
Source: Royal Society of Chemistry journal article supplement (doi:10.1039/d2ta08541k), 2023-01-01
Supplement: d2ta08541k1.pdf [file d2ta08541k1.pdf]

## **Supporting Information**

**For**

**Core-shell FTO@Co<sub>3</sub>O<sub>4</sub> Nanoparticles as Active and Stable Anode**

**Catalysts for Acidic Oxygen Evolution Reaction and Proton**

**Exchange Membrane Water Electrolysis**

**Yong-Xian Yeh, Chih-Chieh Cheng, Pei-Syuan Jhu, Shin-Hong Lin, Po-Wei  
Chen, Shih-Yuan Lu\***

Department of Chemical Engineering, National Tsing Hua University, Hsinchu 30013,  
Taiwan.

**\*Email: [sylu@mx.nthu.edu.tw](mailto:sylu@mx.nthu.edu.tw) (Shih-Yuan Lu)**

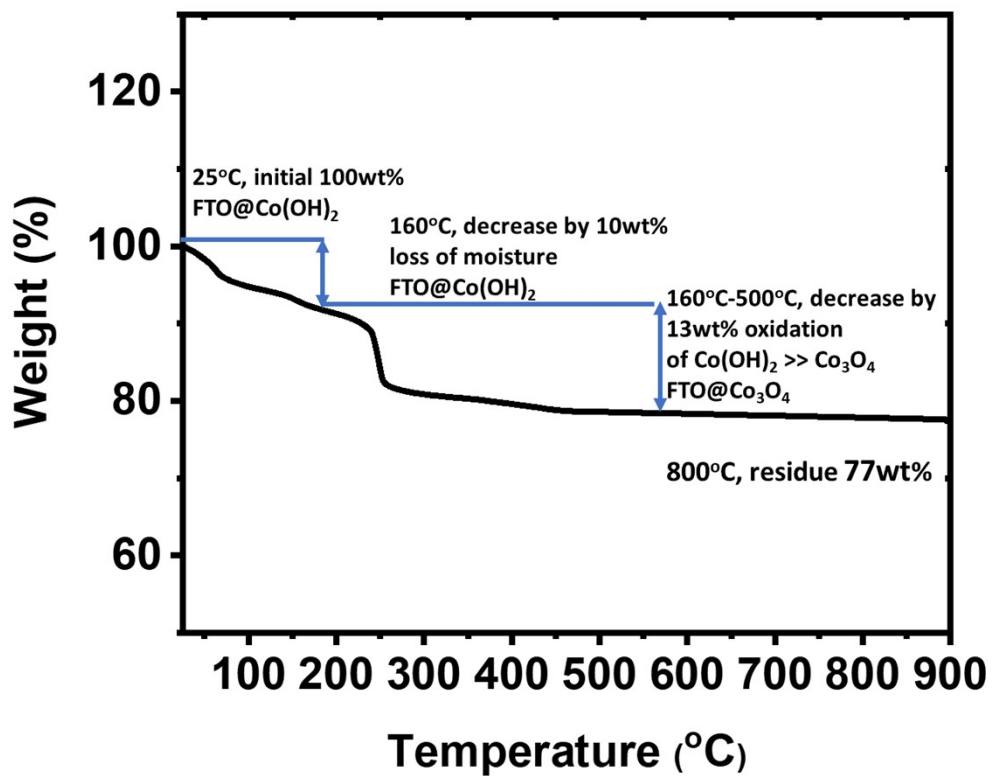

**Figure S1.** Thermogravimetric curve of FTO@Co(OH)<sub>2</sub> in air. Heating rate: 5 °C min<sup>-1</sup>.

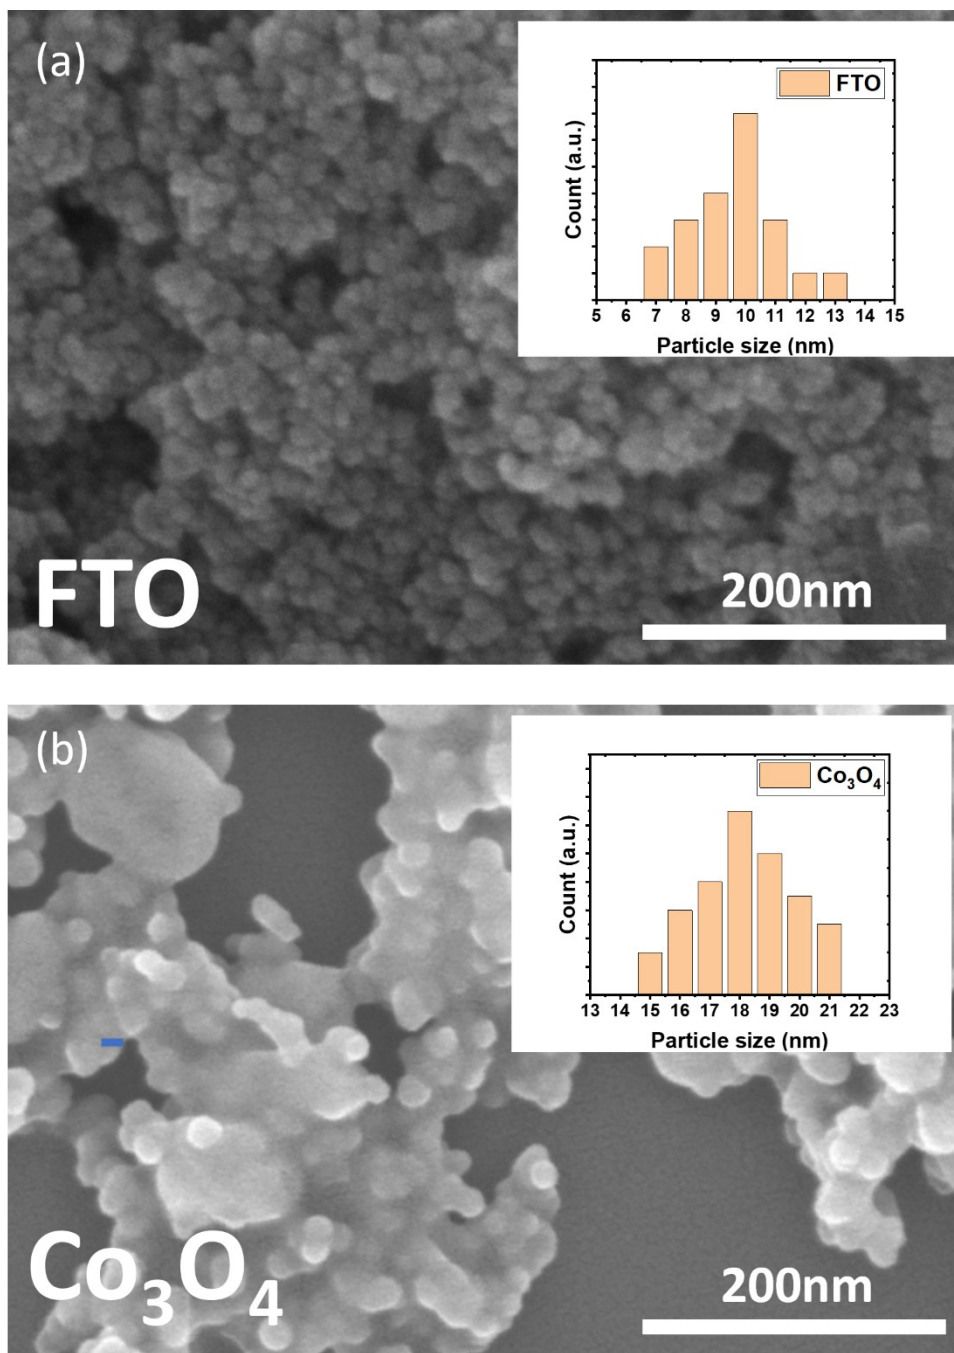

**Figure S2.** SEM images of (a) FTO and (b)  $\text{Co}_3\text{O}_4$  nanoparticles. Insets show size distributions of nanoparticles.

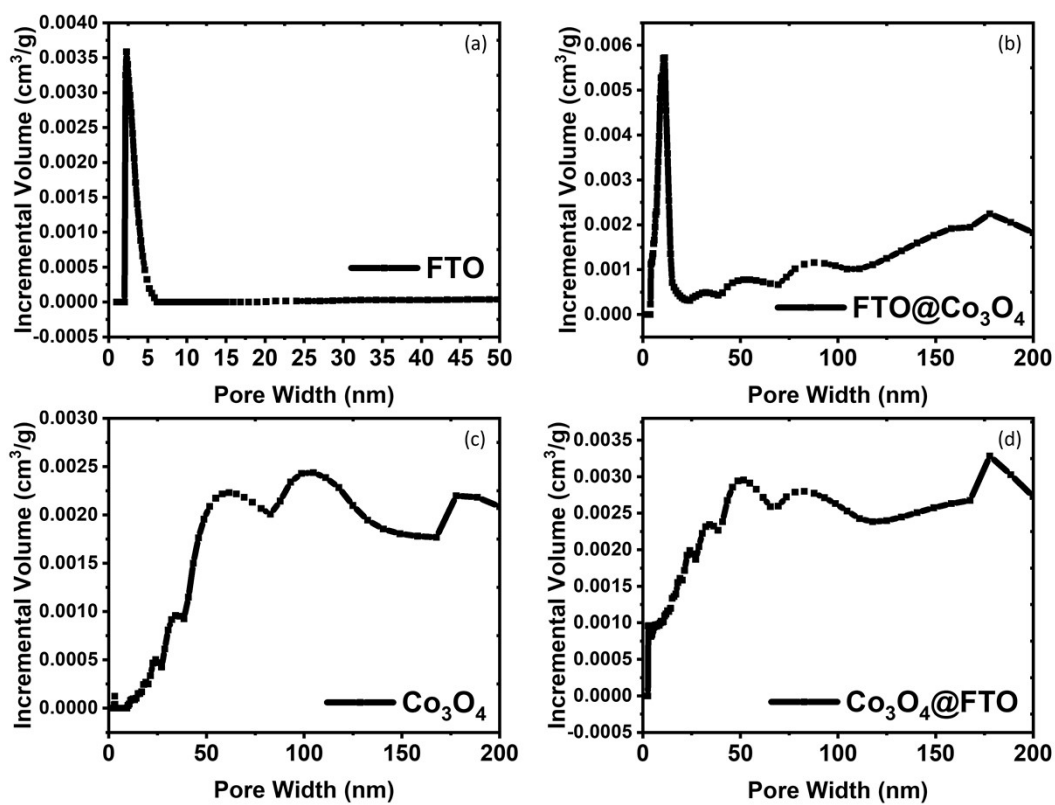

**Figure S3.** Pore size distribution of (a)FTO (b)FTO@Co<sub>3</sub>O<sub>4</sub> (c) Co<sub>3</sub>O<sub>4</sub> (d) Co<sub>3</sub>O<sub>4</sub>@FTO nanoparticles.

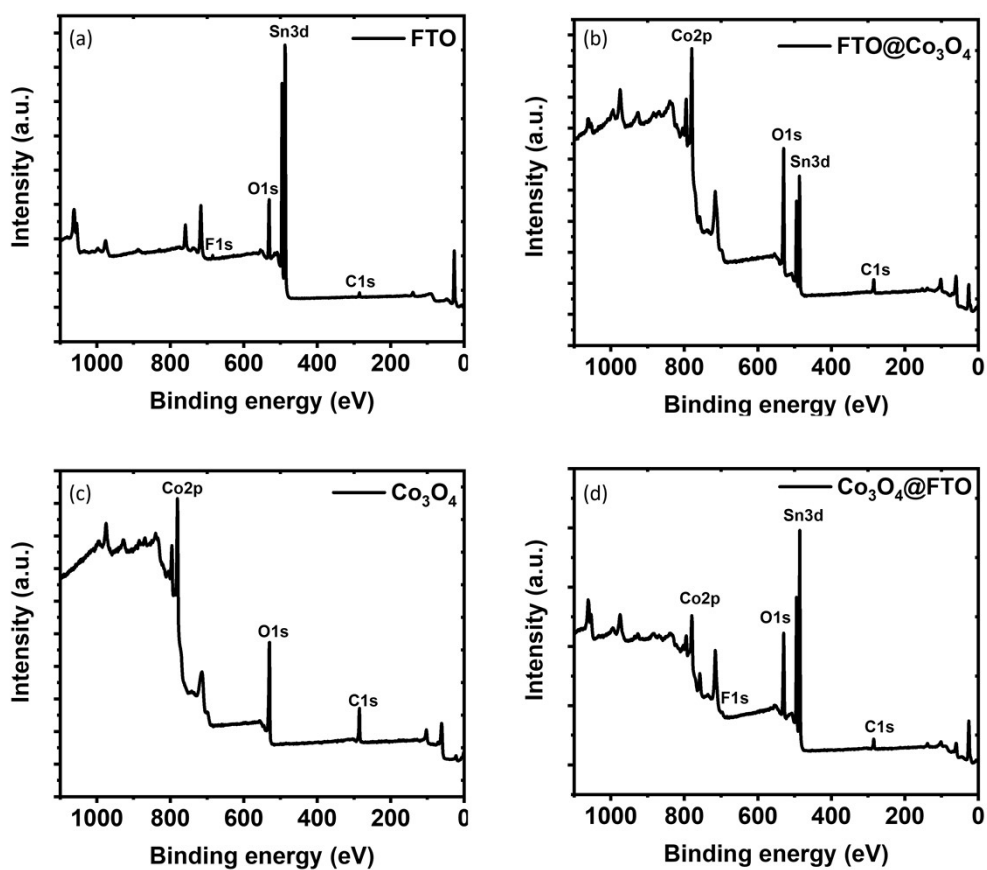

**Figure S4.** XPS survey spectra of (a) FTO, (b) FTO@Co<sub>3</sub>O<sub>4</sub>, (c) Co<sub>3</sub>O<sub>4</sub>, and (d)Co<sub>3</sub>O<sub>4</sub>@FTO.

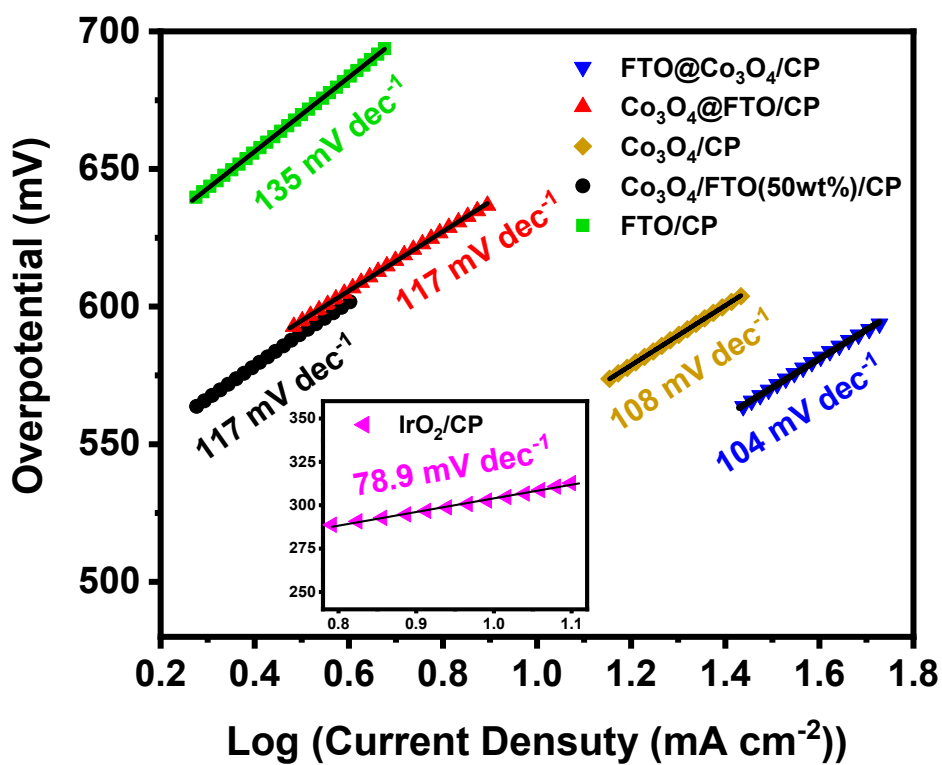

**Figure S5.** Tafel plots of FTO/CP, FTO@Co<sub>3</sub>O<sub>4</sub>/CP, Co<sub>3</sub>O<sub>4</sub>/CP, Co<sub>3</sub>O<sub>4</sub>@FTO/CP, and Co<sub>3</sub>O<sub>4</sub>/FTO(50wt%)/CP.

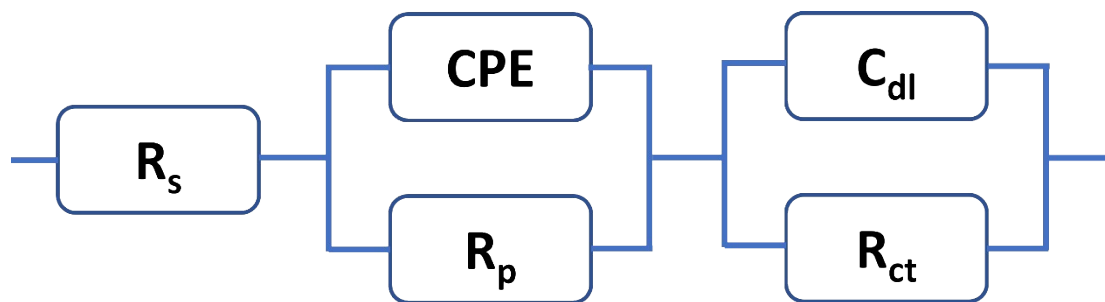

**Figure S6.** Equivalent circuit model:  $R_s$  for solution resistance, CPE for constant phase element accounting for electrode porosity,  $R_p$  for electrode porosity resistance,  $C_{dl}$  for double layer capacitance, and  $R_{ct}$  for charge transfer resistance.

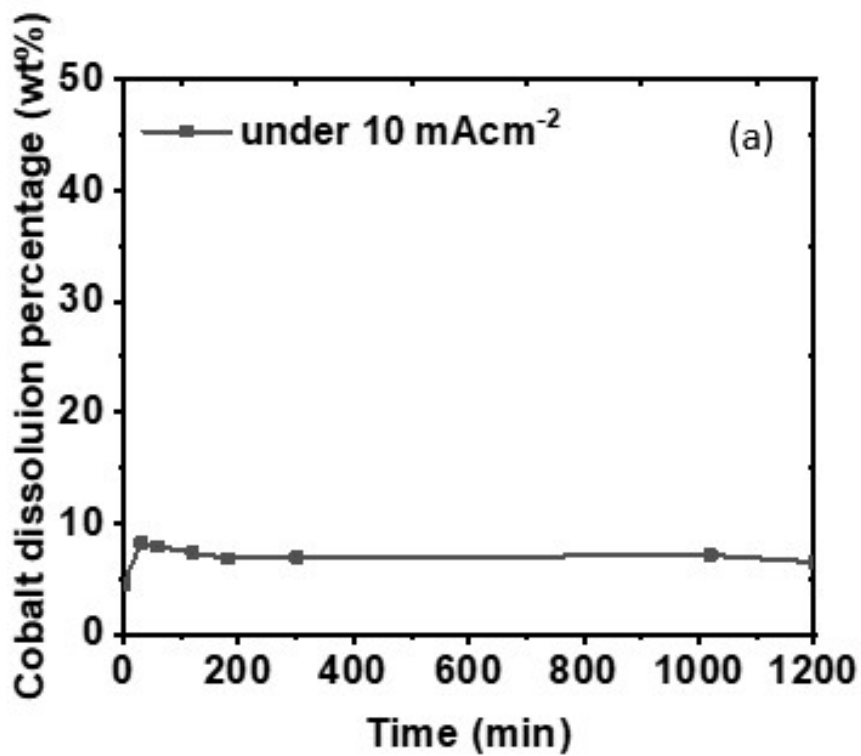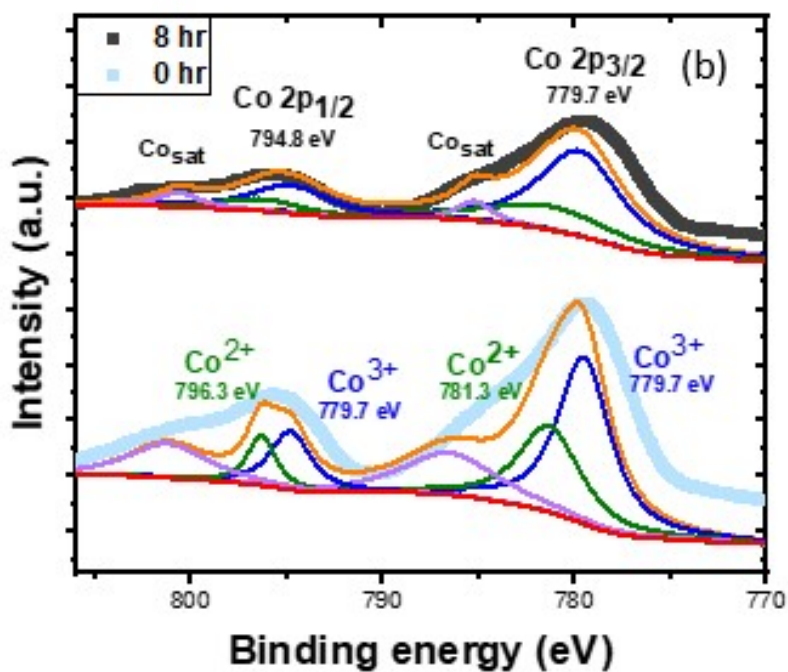

**Figure S7.** (a) Percentages of Co leaching from FTO@Co<sub>3</sub>O<sub>4</sub>/CP operated at 10 mA cm<sup>-2</sup> during course of 20 hours. (b) HRXPS spectra of Co 2p of FTO@Co<sub>3</sub>O<sub>4</sub>/CP after operations at 10 mA cm<sup>-2</sup> for 0 and 8 hours.



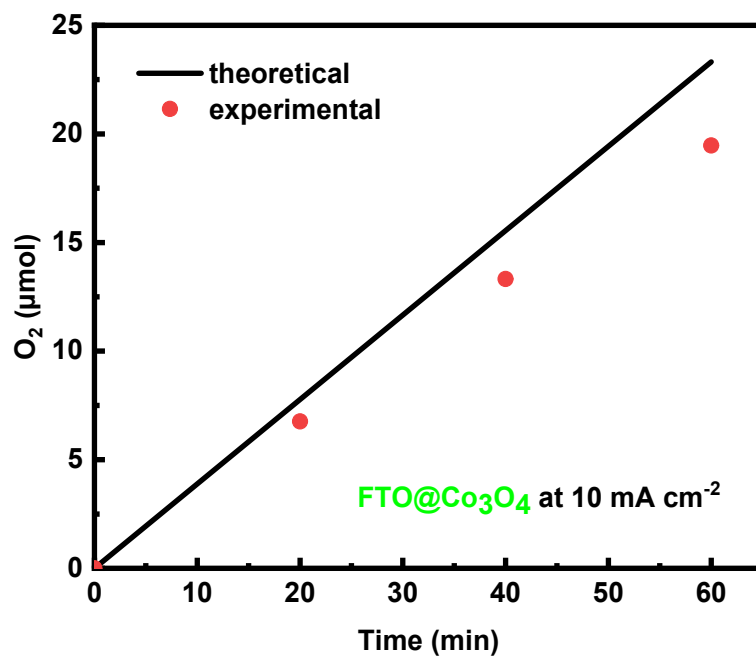

**Figure S8.** Theoretical and experimental O<sub>2</sub> generation for determination of Faradaic efficiency of FTO@Co<sub>3</sub>O<sub>4</sub>/CP operated at 10 mA cm<sup>-2</sup> for 60 min. Experimental test conditions: 0.25 cm<sup>2</sup> for electrode surface area and 298 K for temperature.

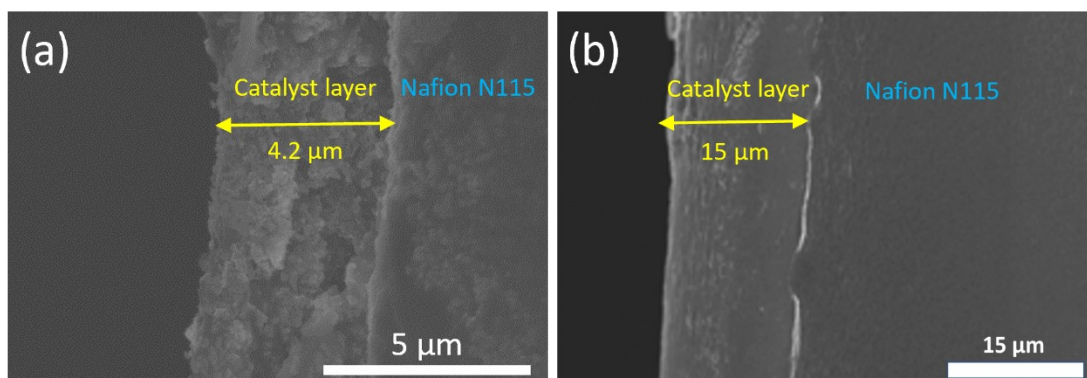

**Figure S9.** SEM images of (a) anode (FTO@Co<sub>3</sub>O<sub>4</sub>) and (b) cathode (Pt/C).

**Table S1.** PEMWE performances of non-noble metal based anode catalysts.

| Membrane (temperature) | Cathode catalyst (loading in mg cm <sup>-2</sup> ) | Anode catalyst (loading in mg cm <sup>-2</sup> ) | Current density @2 V (in A cm <sup>-2</sup> ) | Reference        |
|------------------------|----------------------------------------------------|--------------------------------------------------|-----------------------------------------------|------------------|
| N115 (25°C)            | Pt/C (0.2)                                         | FTO@Co <sub>3</sub> O <sub>4</sub> (3.0)         | 0.205                                         | <b>This work</b> |
| N115 (80 °C)           | Pt/C (0.5)                                         | CoHFe/ATO (2.0)                                  | 0.05-0.1                                      | [S1]             |
| N117 (25°C)            | Pt/C (0.5)                                         | Co/29BC (N/A)                                    | 0.12                                          | [S2]             |
| N117 (25°C)            | Pt/C (0.1)                                         | γ-MnO <sub>2</sub> (3.5)                         | 0.13                                          | [S3]             |

## Reference:

[S1] B. Rodríguez-García, Á. Reyes-Carmona, I. Jiménez-Morales, M. Blasco-Ahicart, S. Cavaliere, M. Dupont, D. Jones, J. Rozière, J.R. Galán-Mascarós, F. Jaouen, Cobalt hexacyanoferrate supported on Sb-doped SnO<sub>2</sub> as a non-noble catalyst for oxygen evolution in acidic medium, *Sustainable Energy & Fuels* 2(3) (2018) 589-597. <https://doi.org/10.1039/C7SE00512A>.

[S2] Q. Lai, V. Vedyappan, K.-F. Aguey-Zinsou, H. Matsumoto, One-Step Synthesis of Carbon-Protected Co<sub>3</sub>O<sub>4</sub> Nanoparticles toward Long-Term Water Oxidation in Acidic Media, *Advanced Energy and Sustainability Research* 2(11) (2021) 2100086. <https://doi.org/https://doi.org/10.1002/aesr.202100086>.

[S3] A. Li, H. Ooka, N. Bonnet, T. Hayashi, Y. Sun, Q. Jiang, C. Li, H. Han, R. Nakamura, Stable Potential Windows for Long-Term Electrocatalysis by Manganese Oxides Under Acidic Conditions, *Angew Chem Int Ed Engl* 58(15) (2019) 5054-5058. <https://doi.org/10.1002/anie.201813361>.
